# Supplementary material for: Sequence Analysis of Six Candidate Genes in Miniature Schnauzers with Primary Hypertriglyceridemia
Source: MDPI journal article supplement (doi:10.3390/genes15020193), 2024-01-31
Supplement: s1 [file s1]

Table S1. Breed counts from the private WGS database.

| <b>Breed</b>                   | <b>#</b> |
|--------------------------------|----------|
| Akita                          | 1        |
| American Staffordshire Terrier | 2        |
| American Foxhound              | 1        |
| Australian Cattle Dog          | 2        |
| Australian Shepherd            | 3        |
| Bichon Frise                   | 3        |
| Border Collie                  | 8        |
| Border Terrier                 | 1        |
| Boston Terrier                 | 5        |
| Bouvier des Flandres           | 10       |
| Boxer                          | 37       |
| Boykin Spaniel                 | 3        |
| Brittany Spaniel               | 3        |
| Bulldog                        | 28       |
| Bullmastiff                    | 19       |
| Cairn Terrier                  | 7        |
| Cavalier King Charles Spaniels | 23       |
| Collie                         | 5        |
| Coonhound                      | 1        |
| Corgi                          | 8        |
| Dachshund                      | 15       |
| Doberman Pinscher              | 8        |
| English Bulldog                | 6        |
| English Cocker Spaniel         | 1        |
| English Mastiff                | 1        |
| French Bulldog                 | 21       |
| German Shepherd                | 27       |
| Golden Retriever               | 46       |
| Goldendoodle                   | 2        |
| Great Dane                     | 25       |
| Great Pyrenees                 | 3        |
| Havanese                       | 2        |

|                                           |            |
|-------------------------------------------|------------|
| Irish Setter                              | 3          |
| Irish Wolfhound                           | 20         |
| Labradoodle                               | 2          |
| Labrador Retriever                        | 22         |
| Lhasa Apso                                | 3          |
| Miniature Poodle                          | 10         |
| Miniature Schnauzer                       | 30         |
| Mixed Breed                               | 9          |
| Newfoundland                              | 15         |
| Pomeranian                                | 13         |
| Portuguese Water Dog                      | 11         |
| Pug                                       | 4          |
| Rhodesian Ridgeback                       | 4          |
| Rottweiler                                | 17         |
| Scottish Deerhound                        | 10         |
| Scottish Terrier                          | 6          |
| Sheltie                                   | 9          |
| Shih Tzu                                  | 1          |
| Shiloh Shepherd                           | 9          |
| Siberian Huskey                           | 16         |
| Spanish Greyhound                         | 1          |
| Spinoni Italiano                          | 1          |
| Standard Poodle                           | 28         |
| Toy Poodle                                | 4          |
| Wachtelhund                               | 2          |
| Welsh Springer Spaniel                    | 4          |
| Welsh Terrier                             | 1          |
| Whippet                                   | 15         |
| West Highland White Terrier               | 4          |
| Yorkshire Terrier                         | 42         |
| <b>Total non-Miniature Schnauzer dogs</b> | <b>613</b> |
| <b>Total all dogs</b>                     | <b>643</b> |
