# Supplementary material for: Sequence Analysis of Six Candidate Genes in Miniature Schnauzers with Primary Hypertriglyceridemia
Source: MDPI journal article supplement (doi:10.3390/genes15020193), 2024-01-31
Supplement: s1 [file s1]

Table S3. The *APOE* TATA box sequence in 67 vertebrate species. The 3 bp that are deleted in the variant detected are shown in red to highlight their conservation across species.

|                      |      |
|----------------------|------|
| Dog                  | TATA |
| Human                | TATA |
| Chimp                | TATA |
| Gorilla              | TATA |
| Gibbon               | TATA |
| Rhesus               | TATA |
| Crab-eating macaque  | TATA |
| Baboon               | TATA |
| Green monkey         | TATA |
| Marmoset             | TATA |
| Squirrel monkey      | TATA |
| Bushbaby             | TATA |
| Chinese tree shrew   | TATA |
| Squirrel             | TATA |
| Less Egyptian Jerboa | TATA |
| Prairie Vole         | TATA |
| Chinese Hamster      | TATA |
| Golden Hamster       | TATA |
| Mouse                | TATA |
| Rat                  | TATA |
| Naked Mole-rat       | TATA |
| Guinea Pig           | TATA |
| Chinchilla           | TATA |
| Rabbit               | TATA |
| Pika                 | TATA |
| Pig                  | TATA |
| Alpaca               | TATA |
| Bactrian Camel       | TATA |
| Dolphin              | TATA |
| Killer Whale         | TATA |
| Tibetan Antelope     | TATA |
| Cow                  | TATA |
| Sheep                | TATA |
| Domestic Goat        | TATA |
| Cat                  | TATA |
| Ferret               | TATA |
| Panda                | TATA |
| Pacific Walrus       | TATA |
| Weddell Seal         | TATA |
| Black Flying-fox     | TATA |
| Megabat              | TATA |
| Big Brown Bat        | TATA |

|                          |      |
|--------------------------|------|
| David's Myotis Bat       | TATA |
| Little Brown Bat         | TATA |
| Hedgehog                 | TATA |
| Shrew                    | TATA |
| Star-nosed Mole          | TATA |
| Elephant                 | TATA |
| Cape Elephant Shrew      | TATA |
| Manatee                  | TATA |
| Cape Golden Mole         | TATA |
| Tenrec                   | TATA |
| Aardvark                 | TATA |
| Armadillo                | TATA |
| Tasmanian Devil          | TATA |
| Wallaby                  | TATA |
| Brush-tailed rat         | TATA |
| Zebra Finch              | CAGA |
| Green Sea Turtle         | CAGG |
| Chinese Softshell Turtle | CAGG |
| Scarlet Macaw            | GAG- |
| Opossum                  | GGGA |
| American Alligator       | GGGT |
| X. tropicalis            | TCTA |
| Collared Flycatcher      | TGGG |
| Horse                    | TTTA |
